# Supplementary material
Source: publisher figshare collection journal article supplement (https://rs.figshare.com/ndownloader/files/13085177)
Supplement: Supplementary file 1 [file 13085177]

Migrated	Genotype	Juvenile_Density	Adult_Density	Birthseason	Sex	Age_when_sampled	Local_Adult_Density	Weight_as_pup
TRUE	213	15	30	Winter	M	11	2	NA
TRUE	213	15	30	Winter	M	11	2	NA
FALSE	213	9	37	Winter	F	11	20	NA
FALSE	213	3	37	Winter	M	11	8	NA
FALSE	213	4	40	Winter	F	13	9	NA
FALSE	213	3	37	Winter	M	11	8	NA
FALSE	213	19	16	Winter	M	12	4	NA
FALSE	213	48	31	Summer	F	12	6	7.1
TRUE	213	61	25	Summer	M	14	5	7.1
TRUE	213	48	31	Summer	M	12	6	7
FALSE	213	61	25	Summer	F	14	5	7
FALSE	197	73	21	Summer	M	11	6	7.2
FALSE	197	73	21	Summer	M	11	6	7.4
FALSE	213	52	35	Summer	M	14	14	5.5
FALSE	197	41	54	Summer	M	13	13	6.6
TRUE	213	46	50	Summer	M	11	7	6.6
FALSE	213	35	48	Summer	M	13	13	5.6
TRUE	213	48	31	Summer	M	12	7	7.5
FALSE	197	51	42	Summer	M	11	7	5.9
FALSE	197	36	61	Summer	M	11	13	6.3
FALSE	213	52	39	Summer	F	14	13	5.2
FALSE	197	41	54	Summer	M	13	13	6.6
FALSE	197	51	42	Summer	F	11	7	6.9
FALSE	197	41	54	Summer	M	13	13	6.4
FALSE	213	44	45	Summer	M	11	16	4.6
TRUE	197	48	44	Summer	F	14	7	5.9
TRUE	197	48	44	Summer	M	14	7	NA
FALSE	197	35	62	Summer	M	15	6	6.6
TRUE	213	36	61	Summer	F	11	10	5.3
FALSE	197	36	61	Summer	M	11	17	6
TRUE	197	48	58	Summer	F	13	10	5.7
FALSE	197	48	58	Summer	M	13	10	5.5
FALSE	197	48	58	Summer	M	13	10	5.6
TRUE	213	48	58	Summer	M	13	6	8.3
TRUE	197	48	58	Summer	M	13	6	8.2
FALSE	197	49	41	Summer	F	11	17	5.6
FALSE	197	48	58	Summer	M	13	10	5.6
FALSE	197	36	61	Summer	F	11	17	5.2
FALSE	197	48	58	Summer	M	13	17	5.9
FALSE	197	16	84	Winter	M	13	13	7.4
FALSE	197	35	48	Summer	M	13	13	5
FALSE	197	27	71	Winter	M	12	13	5.8
FALSE	197	48	58	Summer	F	13	13	6.2
FALSE	213	13	79	Winter	F	13	13	4.4
FALSE	197	45	59	Summer	M	11	13	5.4
FALSE	213	45	59	Summer	M	11	13	5.3
TRUE	197	32	82	Winter	M	12	8	4.5
FALSE	197	31	86	Winter	M	11	13	7.3
FALSE	197	41	63	Winter	F	13	13	5.4
TRUE	197	31	86	Winter	F	11	13	6.8
FALSE	213	29	87	Winter	F	12	13	6.4
FALSE	197	29	87	Winter	F	12	13	6
FALSE	197	41	63	Winter	F	13	13	7.3
FALSE	197	26	90	Winter	M	14	11	5.6
FALSE	197	7	89	Winter	M	13	20	6.4
TRUE	197	32	82	Winter	M	12	11	5.7
FALSE	197	7	89	Winter	F	13	20	6.7
FALSE	197	12	80	Winter	M	12	24	4.8
FALSE	197	26	90	Winter	F	13	9	7.8
FALSE	197	33	66	Winter	F	14	9	5.1
FALSE	197	32	82	Winter	F	12	11	4.4
FALSE	197	36	61	Summer	M	11	24	5.9
FALSE	197	7	89	Winter	F	13	20	6.3
FALSE	197	31	86	Winter	M	11	20	7.8
FALSE	197	31	86	Winter	M	11	20	6.8
FALSE	213	27	71	Winter	F	12	11	6
TRUE	197	27	71	Winter	F	12	11	6.3
FALSE	213	27	71	Winter	F	12	11	5.7
TRUE	213	27	71	Winter	M	12	11	6
FALSE	197	17	86	Winter	M	13	24	5.2
FALSE	197	36	61	Summer	F	11	24	5.6
FALSE	197	7	89	Winter	M	13	20	6.3
TRUE	197	32	82	Winter	M	12	11	4.5
FALSE	213	16	84	Winter	F	13	18	7.6
FALSE	197	33	66	Winter	F	14	12	4.7
FALSE	213	7	89	Winter	F	13	23	6.6
FALSE	197	16	84	Winter	F	13	18	7.6
FALSE	197	17	86	Winter	F	13	26	5.5
FALSE	197	16	84	Winter	M	13	18	7.1
FALSE	197	21	77	Winter	F	14	26	4.6
FALSE	197	7	89	Winter	F	13	23	6.6
FALSE	197	20	88	Winter	F	12	18	5.3
FALSE	197	133	99	Summer	M	13	29	7.8
FALSE	197	102	89	Summer	F	11	17	5.6
FALSE	197	102	89	Summer	M	11	17	6.4
FALSE	197	143	92	Summer	M	13	27	6.6
FALSE	197	101	90	Summer	F	13	27	6.6
FALSE	197	133	99	Summer	M	13	27	7.8
FALSE	197	143	92	Summer	F	13	27	6.4
FALSE	197	104	90	Summer	M	13	17	7.8
FALSE	197	26	90	Winter	F	13	16	6.5
FALSE	197	136	94	Summer	M	12	19	7
FALSE	197	20	88	Winter	F	12	27	5.6
FALSE	197	136	94	Summer	F	12	29	7
FALSE	197	137	89	Summer	M	13	29	6.3
FALSE	197	147	105	Summer	M	14	29	6.6
FALSE	197	136	94	Summer	F	12	19	6.9
FALSE	197	133	99	Summer	F	13	29	8.1
FALSE	197	137	89	Summer	M	13	29	6.9
FALSE	197	147	102	Summer	M	15	19	4.5
FALSE	197	154	106	Summer	M	13	17	6.2
FALSE	197	133	99	Summer	F	13	29	8.1
FALSE	197	101	90	Summer	M	13	27	7.4
FALSE	197	13	79	Winter	M	13	29	5
TRUE	197	147	102	Summer	M	15	19	4.8
FALSE	197	143	92	Summer	M	13	27	6.3
FALSE	197	147	105	Summer	F	14	29	7.1
FALSE	213	143	91	Summer	M	13	29	8.1
FALSE	197	137	89	Summer	F	15	27	7.5
FALSE	197	108	89	Summer	M	13	27	7.6
FALSE	197	156	96	Summer	M	13	34	6.8
FALSE	197	111	112	Summer	F	13	34	8.2
FALSE	197	111	112	Summer	M	13	20	5.9
FALSE	197	111	112	Summer	M	13	34	8.5
FALSE	213	133	103	Summer	F	13	34	9.7
FALSE	197	133	103	Summer	F	13	26	7.2
FALSE	197	156	96	Summer	F	13	34	6.3
FALSE	197	150	99	Summer	F	13	20	7.5
FALSE	197	133	103	Summer	M	13	26	7
FALSE	197	136	103	Summer	M	13	26	6.1
FALSE	197	133	103	Summer	F	13	34	8.5
FALSE	197	22	90	Winter	M	13	26	6
FALSE	197	111	112	Summer	M	13	34	8.1
FALSE	213	133	103	Summer	M	13	26	7.5
FALSE	197	128	103	Summer	M	13	20	8.2
FALSE	197	111	112	Summer	F	13	34	8
FALSE	197	111	112	Summer	F	13	34	7.5
FALSE	197	136	103	Summer	F	13	26	5.9
FALSE	197	150	99	Summer	F	13	20	7.2
FALSE	197	136	103	Summer	M	13	18	6.3
TRUE	197	157	100	Summer	F	14	34	6.5
FALSE	197	144	97	Summer	F	13	19	8.4
FALSE	197	132	105	Summer	M	14	20	7.9
FALSE	197	157	100	Summer	F	13	26	7.3
FALSE	197	111	112	Summer	F	13	20	5.9
TRUE	197	150	99	Summer	M	13	20	7.4
FALSE	197	128	103	Summer	M	13	20	8.6
FALSE	197	111	112	Summer	M	13	34	7.7
FALSE	197	146	98	Summer	M	14	19	8.2
FALSE	197	133	99	Summer	M	13	34	8.1
FALSE	197	146	98	Summer	F	14	19	7.6
FALSE	197	111	112	Summer	M	13	20	6.2
FALSE	213	133	103	Summer	M	13	19	7.4
FALSE	197	132	105	Summer	M	14	20	7.6
FALSE	197	133	103	Summer	M	13	15	7.9
FALSE	213	94	90	Summer	F	13	20	7.3
FALSE	197	71	90	Summer	M	12	17	6.1
FALSE	197	17	86	Winter	F	13	17	5.5
FALSE	197	80	92	Summer	F	13	25	6.9
FALSE	197	122	91	Summer	M	13	17	6.2
FALSE	197	80	92	Summer	F	13	25	7.9
FALSE	197	122	91	Summer	M	13	17	6.4
FALSE	197	122	91	Summer	F	13	17	6.4
FALSE	213	157	100	Summer	M	13	25	7.5
FALSE	197	157	100	Summer	M	13	25	8.3
FALSE	197	122	91	Summer	M	13	17	6.3
FALSE	197	99	92	Summer	F	13	19	6.2
FALSE	197	88	97	Summer	M	13	19	6.4
FALSE	197	88	97	Summer	M	13	19	6
FALSE	197	115	90	Summer	M	13	19	6.1
FALSE	197	88	97	Summer	F	12	19	5.7
FALSE	197	131	95	Summer	F	13	15	5.9
FALSE	197	109	95	Summer	F	13	27	6.9
FALSE	197	103	96	Summer	M	12	27	6
FALSE	197	124	96	Summer	M	13	27	6.8
FALSE	197	103	96	Summer	F	12	27	6.4
FALSE	197	131	95	Summer	M	13	15	7.2
FALSE	197	147	102	Summer	F	13	15	7.1
FALSE	197	131	95	Summer	M	13	27	7.4
FALSE	213	60	103	Summer	F	13	27	6.7
FALSE	197	98	99	Summer	M	11	27	5.9
FALSE	213	98	99	Summer	M	11	27	5.4
FALSE	213	98	99	Summer	M	11	27	5.4
FALSE	213	60	103	Summer	F	13	27	6.6
FALSE	197	73	97	Summer	M	13	27	8.5
FALSE	213	67	97	Summer	F	13	27	6.8
FALSE	197	145	91	Summer	F	12	27	7.1
FALSE	197	148	90	Summer	M	15	27	8.6
TRUE	197	143	90	Summer	F	14	15	7.5
FALSE	197	131	95	Summer	M	13	13	5.2
FALSE	197	52	107	Winter	M	13	18	5.7
FALSE	197	55	105	Summer	F	13	18	7.3
FALSE	197	80	91	Summer	F	11	18	6.3
FALSE	197	51	109	Winter	M	13	18	8.6
FALSE	197	51	109	Winter	M	13	18	8.7
FALSE	197	136	95	Summer	M	13	18	7.3
FALSE	197	148	90	Summer	M	15	16	6
FALSE	197	115	90	Summer	M	13	18	5.5
FALSE	197	136	95	Summer	M	13	24	7.3
FALSE	213	51	109	Winter	M	13	18	8.3
FALSE	197	88	97	Summer	M	13	18	6.3
FALSE	197	37	103	Winter	M	12	27	4.5
FALSE	197	44	110	Winter	F	13	27	5.7
FALSE	213	42	113	Winter	M	13	19	5.9
TRUE	197	131	95	Summer	M	13	11	7
FALSE	197	41	109	Winter	F	13	27	6
FALSE	197	33	113	Winter	M	13	23	7
FALSE	197	43	109	Winter	M	14	22	5.9
FALSE	197	112	98	Summer	M	12	23	6.2
FALSE	197	52	107	Winter	M	13	19	5.8
FALSE	197	37	103	Winter	M	12	27	4.4
FALSE	197	44	111	Winter	M	13	23	7.3
FALSE	197	60	103	Summer	F	11	23	5.1
FALSE	197	51	109	Winter	M	13	19	7.6
FALSE	197	33	113	Winter	M	13	27	7.5
FALSE	197	33	113	Winter	M	13	23	6
FALSE	197	91	107	Summer	M	14	19	7.9
FALSE	197	44	110	Winter	F	13	27	5.7
FALSE	197	55	105	Summer	M	13	23	7.4
FALSE	197	122	91	Summer	M	13	27	6
FALSE	197	33	113	Winter	M	13	23	6.3
FALSE	197	33	113	Winter	M	13	23	6.3
FALSE	197	41	109	Winter	F	13	27	5.8
FALSE	197	44	110	Winter	F	13	27	5.9
FALSE	197	36	116	Winter	M	15	23	7.6
TRUE	197	43	109	Winter	F	14	23	NA
FALSE	197	25	116	Winter	M	13	22	6
FALSE	197	54	117	Winter	M	13	30	5.8
TRUE	197	19	120	Winter	M	12	20	6.4
FALSE	197	23	115	Winter	M	11	29	4.4
FALSE	197	33	113	Winter	F	13	29	6.8
FALSE	197	36	116	Winter	F	15	29	7.9
FALSE	197	52	107	Winter	F	13	30	5.5
FALSE	197	44	115	Winter	F	13	30	6.3
FALSE	197	52	107	Winter	F	13	30	6
FALSE	197	43	111	Winter	F	13	30	6.3
FALSE	197	45	111	Winter	F	11	30	7.1
FALSE	213	45	59	Summer	F	11	32	5.7
FALSE	197	112	98	Summer	F	12	29	5.9
FALSE	197	136	95	Summer	F	13	29	6.9
FALSE	197	21	118	Winter	F	13	29	4.3
TRUE	197	34	117	Winter	M	13	20	7.6
FALSE	197	21	118	Winter	F	13	29	4
FALSE	197	44	115	Winter	M	13	30	7.3
FALSE	213	43	111	Winter	M	13	30	7.2
FALSE	197	137	89	Summer	F	13	21	6.1
FALSE	197	44	115	Winter	M	13	21	6.4
FALSE	197	52	107	Winter	F	13	21	5.4
TRUE	197	143	90	Summer	M	14	15	7.7
FALSE	197	33	113	Winter	F	13	29	6.1
FALSE	197	33	113	Winter	F	13	29	6.2
FALSE	197	42	113	Winter	M	13	30	6.2
FALSE	213	22	90	Winter	F	13	30	5.5
FALSE	197	42	113	Winter	F	13	30	6.4
FALSE	197	25	116	Winter	M	13	29	6.6
FALSE	197	77	116	Summer	F	15	26	9.3
TRUE	197	44	111	Winter	F	13	23	7.4
TRUE	213	60	103	Summer	M	13	26	6.5
FALSE	197	34	117	Winter	M	13	26	7.2
TRUE	197	98	116	Summer	M	13	32	8.4
FALSE	197	19	120	Winter	F	12	26	6.2
FALSE	197	44	115	Winter	F	13	32	6.9
FALSE	197	44	110	Winter	F	13	26	5.8
TRUE	197	55	105	Summer	F	13	23	7.1
FALSE	213	51	109	Winter	F	13	32	8.4
TRUE	197	44	111	Winter	F	13	23	6.9
FALSE	197	33	113	Winter	F	13	23	6.4
FALSE	197	98	116	Summer	M	13	32	8.2
TRUE	197	44	110	Winter	M	13	26	5.5
FALSE	197	71	116	Winter	M	14	32	6.6
FALSE	197	79	120	Winter	M	12	23	6.2
FALSE	197	76	118	Winter	M	12	32	5.8
FALSE	197	44	115	Winter	F	13	32	6.2
FALSE	197	36	116	Winter	F	15	42	8
FALSE	197	90	113	Summer	M	13	26	6.7
FALSE	197	98	116	Summer	M	13	26	7.6
FALSE	197	79	120	Winter	M	12	22	6.1
FALSE	197	87	118	Summer	M	13	26	6.9
FALSE	197	87	108	Summer	M	13	26	5.7
FALSE	197	89	113	Summer	M	13	29	6.6
FALSE	197	87	108	Summer	M	13	26	5.8
FALSE	197	98	116	Summer	M	13	27	6.9
FALSE	197	89	113	Summer	F	13	28	6.6
FALSE	197	93	107	Summer	F	13	29	7.2
FALSE	197	117	116	Summer	F	14	29	6.9
FALSE	197	111	118	Summer	F	12	21	7.4
FALSE	197	85	113	Summer	F	11	26	6.9
FALSE	197	87	118	Summer	M	13	26	6.3
FALSE	197	80	119	Summer	F	13	27	5.9
FALSE	197	92	114	Summer	F	13	26	6.9
FALSE	197	137	110	Summer	F	14	27	7.6
FALSE	197	117	116	Summer	M	14	29	7.6
FALSE	197	87	118	Summer	M	13	26	7.9
FALSE	197	89	113	Summer	F	13	29	7.1
FALSE	197	123	111	Summer	M	13	27	5.7
FALSE	197	117	116	Summer	M	14	29	6.2
FALSE	197	39	106	Winter	F	13	21	7.8
FALSE	197	75	118	Winter	F	12	21	5.8
FALSE	197	117	116	Summer	F	13	21	6.9
FALSE	197	85	115	Summer	F	12	17	6.8
FALSE	197	75	118	Winter	F	12	21	5.8
FALSE	197	117	116	Summer	M	13	21	7.7
FALSE	197	95	108	Summer	M	13	21	7
FALSE	197	135	117	Summer	M	13	28	9.1
FALSE	197	96	114	Summer	M	11	20	5.3
FALSE	197	64	99	Summer	F	12	28	7.8
FALSE	197	79	120	Winter	F	12	34	3.6
FALSE	197	100	122	Summer	F	14	34	7.7
FALSE	197	118	118	Summer	M	15	34	7.2
TRUE	197	89	113	Summer	F	12	34	4.9
FALSE	197	100	122	Summer	M	14	34	7.5
FALSE	197	135	117	Summer	M	13	28	9
FALSE	197	135	117	Summer	M	13	28	8.6
FALSE	197	44	115	Winter	F	12	20	6.2
FALSE	197	85	117	Summer	M	13	28	7.6
TRUE	197	100	122	Summer	M	14	34	8.4
FALSE	197	100	122	Summer	M	14	34	7.5
FALSE	197	100	122	Summer	M	14	34	7.2
FALSE	197	109	115	Summer	M	13	34	6.3
FALSE	197	102	116	Summer	M	13	34	7.8
FALSE	197	135	117	Summer	F	13	28	7.7
FALSE	197	135	117	Summer	M	13	28	8.9
FALSE	197	144	111	Summer	F	13	34	6.2
FALSE	197	64	99	Summer	F	12	28	8.9
FALSE	197	127	112	Summer	M	13	16	6.3
FALSE	197	143	103	Summer	M	13	16	7.3
FALSE	213	121	114	Summer	M	13	20	5.9
FALSE	197	108	118	Summer	M	12	41	6.6
FALSE	197	158	101	Summer	M	13	41	7.4
FALSE	197	135	111	Summer	F	13	41	6.6
FALSE	197	147	112	Summer	F	13	41	5.7
FALSE	197	135	111	Summer	M	13	18	6.2
FALSE	197	130	96	Summer	M	13	41	5.5
FALSE	197	100	122	Summer	F	14	56	7.9
FALSE	197	135	111	Summer	M	13	16	6.6
FALSE	197	108	118	Summer	M	12	41	5.5
FALSE	197	132	105	Summer	M	14	41	5
FALSE	197	135	111	Summer	M	13	41	6.1
FALSE	197	130	96	Summer	M	13	41	6.6
FALSE	197	130	96	Summer	F	13	41	6.3
FALSE	197	108	118	Summer	M	12	41	6.5
FALSE	197	132	105	Summer	F	14	41	5.2
FALSE	197	147	112	Summer	F	13	41	5
FALSE	197	90	107	Summer	M	12	20	6
FALSE	197	158	101	Summer	F	14	41	6.6
FALSE	197	130	96	Summer	F	13	41	6.2
FALSE	197	130	96	Summer	M	13	41	6.5
FALSE	197	145	99	Summer	M	14	41	8.4
FALSE	197	135	111	Summer	F	13	41	8.1
FALSE	197	135	111	Summer	M	13	41	6.5
FALSE	213	139	97	Summer	M	13	18	7.7
FALSE	197	144	100	Summer	M	13	18	6.5
FALSE	197	140	97	Summer	M	13	16	6.8
FALSE	197	135	111	Summer	M	13	18	6.6
FALSE	197	108	117	Summer	M	13	18	8
FALSE	197	105	117	Summer	M	12	25	6.9
FALSE	197	67	126	Summer	M	13	25	6.6
FALSE	197	90	108	Summer	F	13	25	7.2
FALSE	197	67	126	Summer	F	13	25	6.5
FALSE	197	135	111	Summer	M	13	18	6.6
FALSE	197	138	91	Summer	F	14	19	6.8
FALSE	197	108	117	Summer	M	13	18	8.1
FALSE	197	62	119	Summer	M	13	18	6.4
FALSE	197	95	108	Summer	F	13	18	6
FALSE	197	54	122	Summer	M	12	28	6.9
FALSE	197	98	118	Summer	F	13	25	10.5
FALSE	197	135	111	Summer	M	13	18	6.1
FALSE	197	124	112	Summer	M	11	19	5.5
FALSE	197	54	122	Summer	M	12	25	6.5
FALSE	197	140	97	Summer	M	13	18	8.5
FALSE	197	127	112	Summer	M	13	18	6.4
FALSE	197	98	118	Summer	F	13	25	9.1
FALSE	197	84	121	Summer	M	14	25	7.6
FALSE	197	104	117	Summer	F	13	18	7
FALSE	197	62	119	Summer	M	13	18	7.2
FALSE	197	67	126	Summer	M	13	28	6.4
FALSE	197	135	111	Summer	M	13	31	6.8
FALSE	197	108	118	Summer	M	12	31	6.1
FALSE	197	67	126	Summer	M	13	25	6.6
FALSE	197	121	114	Summer	F	13	21	7
FALSE	197	135	111	Summer	M	13	25	8.2
FALSE	197	31	128	Winter	M	13	21	5.4
FALSE	197	39	122	Winter	M	13	22	7.5
FALSE	197	37	122	Winter	M	11	21	4.3
FALSE	213	44	118	Winter	F	13	23	6.3
FALSE	213	39	122	Winter	M	13	22	7.2
FALSE	197	84	121	Summer	M	14	21	7.2
FALSE	197	31	128	Winter	M	13	21	5.8
FALSE	197	39	122	Winter	F	13	22	7.1
FALSE	213	102	118	Summer	M	13	15	7.2
FALSE	197	31	128	Winter	M	13	21	5.8
FALSE	213	102	118	Summer	M	13	29	7.8
FALSE	197	124	112	Summer	M	14	35	6
FALSE	197	54	122	Summer	F	12	35	6.3
FALSE	197	23	129	Winter	M	13	35	6.9
FALSE	197	26	132	Winter	M	12	29	6.4
FALSE	197	84	121	Summer	F	14	20	7.6
FALSE	197	62	119	Summer	F	13	29	6.7
FALSE	197	27	138	Winter	M	11	20	5.5
FALSE	197	23	129	Winter	M	13	35	6.5
FALSE	197	31	121	Winter	F	13	35	8.2
FALSE	197	29	136	Winter	M	12	25	5.9
FALSE	197	23	129	Winter	M	13	35	7.3
FALSE	197	23	129	Winter	F	13	35	7.1
FALSE	213	39	122	Winter	F	13	29	7.1
FALSE	197	31	121	Winter	M	13	35	9
FALSE	197	31	121	Winter	M	13	21	9.2
FALSE	197	23	129	Winter	M	13	35	6.8
FALSE	197	33	138	Winter	F	13	25	9.2
FALSE	197	31	121	Winter	F	13	35	8.8
FALSE	197	23	129	Winter	M	13	35	7.2
FALSE	197	26	132	Winter	M	12	29	6.2
FALSE	197	23	129	Winter	F	13	35	6.9
FALSE	197	29	136	Winter	M	12	25	6.8
FALSE	197	31	128	Winter	M	13	20	5.7
FALSE	197	23	129	Winter	M	13	21	6.8
FALSE	197	32	139	Winter	F	13	33	6.9
FALSE	197	29	141	Winter	M	14	33	6.8
FALSE	197	33	138	Winter	F	13	33	6.9
FALSE	197	84	121	Summer	F	14	21	6.8
FALSE	197	124	112	Summer	F	14	28	6
FALSE	197	32	139	Winter	M	13	33	7.9
FALSE	197	145	98	Summer	F	13	21	6.6
FALSE	197	32	139	Winter	F	13	33	7.3
FALSE	197	31	142	Winter	F	13	33	5.7
TRUE	197	67	126	Summer	F	13	28	5.9
FALSE	197	33	138	Winter	M	13	33	6.7
FALSE	197	30	138	Winter	M	14	32	7.8
FALSE	197	26	129	Winter	F	12	21	6.2
FALSE	197	89	113	Summer	F	13	21	6.2
FALSE	197	31	142	Winter	F	13	33	6
FALSE	197	32	139	Winter	F	13	32	7.6
FALSE	197	31	142	Winter	F	13	33	5.8
FALSE	197	29	141	Winter	M	14	33	7
FALSE	197	67	126	Summer	F	13	20	5.4
FALSE	197	165	143	Summer	F	13	40	6.3
FALSE	197	114	160	Summer	M	12	30	6.7
FALSE	197	113	157	Summer	F	12	30	7.5
FALSE	197	165	143	Summer	M	13	36	6.5
FALSE	213	165	143	Summer	F	13	36	5.8
FALSE	197	138	146	Summer	M	12	36	5.7
FALSE	197	31	128	Winter	F	13	30	6.9
FALSE	197	117	128	Summer	M	11	50	5.7
FALSE	197	113	157	Summer	F	12	36	5.2
FALSE	197	133	148	Summer	F	11	36	5.3
FALSE	213	109	165	Summer	F	12	30	6.6
FALSE	197	129	159	Summer	F	14	36	7.8
FALSE	197	174	132	Summer	F	13	30	6.7
FALSE	197	172	130	Summer	M	11	36	4.9
FALSE	213	75	121	Summer	F	13	30	6.2
FALSE	197	24	132	Winter	F	13	30	7.5
FALSE	197	27	138	Winter	F	11	30	4.8
FALSE	197	138	146	Summer	M	12	36	5.5
FALSE	197	129	159	Summer	F	13	30	7.8
FALSE	197	29	141	Winter	F	14	72	7.9
FALSE	197	138	146	Summer	F	12	36	5.8
TRUE	197	165	143	Summer	F	13	36	7.3
FALSE	197	133	148	Summer	F	11	36	4.8
FALSE	197	117	128	Summer	F	11	36	5.9
FALSE	197	172	130	Summer	M	11	32	4.8
FALSE	213	135	169	Summer	M	12	41	6.2
FALSE	197	30	131	Winter	M	13	41	6.6
FALSE	197	177	134	Summer	M	12	41	5.9
FALSE	197	84	121	Summer	F	14	21	7.1
TRUE	197	117	128	Summer	M	11	32	6.7
TRUE	197	165	143	Summer	M	13	32	6.5
FALSE	197	111	159	Summer	M	11	38	5.6
FALSE	197	129	159	Summer	M	14	32	7.8
FALSE	197	182	134	Summer	M	12	41	5.4
FALSE	197	133	148	Summer	F	11	32	5.6
FALSE	197	118	157	Summer	F	14	32	5.2
FALSE	197	122	124	Summer	F	12	41	6.9
FALSE	197	176	137	Summer	F	13	38	7.5
TRUE	197	185	135	Summer	F	14	32	7.2
FALSE	197	129	159	Summer	M	14	32	8
FALSE	197	111	159	Summer	F	14	41	5.9
TRUE	197	113	157	Summer	F	12	41	6.8
TRUE	197	148	123	Summer	F	13	48	6.7
FALSE	197	148	123	Summer	M	13	32	7.4
TRUE	197	107	158	Summer	F	11	32	5.1
FALSE	197	165	143	Summer	F	13	32	6
FALSE	197	113	157	Summer	F	12	32	5.4
FALSE	197	97	164	Summer	F	14	38	7.7
FALSE	197	118	157	Summer	M	14	32	5.8
TRUE	197	155	170	Summer	M	13	38	5.9
FALSE	197	95	166	Summer	F	12	38	6.2
FALSE	197	129	159	Summer	F	13	38	7.1
FALSE	197	97	164	Summer	F	14	38	7.5
FALSE	197	118	157	Summer	M	13	38	7.6
FALSE	197	107	164	Summer	F	13	64	8.3
FALSE	197	97	164	Summer	F	12	38	7.8
FALSE	197	95	166	Summer	F	12	38	6.3
FALSE	197	97	164	Summer	M	12	38	7.8
FALSE	197	135	169	Summer	M	12	27	5.7
FALSE	197	106	170	Summer	M	13	38	8.4
FALSE	197	32	134	Summer	F	13	27	6.3
FALSE	197	117	128	Summer	M	11	38	5.5
FALSE	197	148	123	Summer	M	13	38	6.7
FALSE	197	99	167	Summer	M	12	27	6.2
FALSE	197	181	136	Summer	M	13	38	8.9
FALSE	197	107	164	Summer	F	13	38	8.6
FALSE	197	106	170	Summer	F	13	38	8.2
FALSE	197	148	123	Summer	M	13	27	7.5
FALSE	197	97	164	Summer	M	12	38	7.9
FALSE	197	165	143	Summer	F	11	38	5.9
FALSE	197	114	160	Summer	M	12	20	7.3
FALSE	197	173	154	Summer	M	13	31	7
FALSE	197	108	221	Summer	M	11	37	6.2
FALSE	197	163	171	Summer	F	15	54	9.1
FALSE	197	119	151	Summer	F	14	28	8.5
FALSE	197	124	209	Summer	M	13	30	5.6
FALSE	197	177	149	Summer	F	13	30	6.2
FALSE	197	163	171	Summer	F	15	54	8.3
TRUE	197	174	159	Summer	M	13	30	9.5
FALSE	213	136	186	Summer	M	13	30	8
FALSE	197	129	204	Summer	M	13	54	7.4
FALSE	197	135	169	Summer	F	12	30	6.4
FALSE	197	118	157	Summer	F	13	25	6.4
FALSE	197	144	181	Summer	M	13	54	6.6
FALSE	197	163	171	Summer	F	15	54	9.1
FALSE	197	121	212	Summer	F	13	54	6.6
FALSE	197	134	189	Summer	F	13	31	5.9
FALSE	197	144	181	Summer	M	13	54	7
FALSE	197	136	186	Summer	F	11	54	5
FALSE	197	163	171	Summer	M	13	31	6.2
FALSE	197	168	158	Summer	F	12	54	6.5
FALSE	197	129	159	Summer	F	13	28	6.9
TRUE	197	163	171	Summer	M	15	54	9.2
FALSE	197	134	189	Summer	F	13	28	6.5
FALSE	197	132	185	Summer	F	14	28	6.5
FALSE	197	31	128	Winter	F	13	31	6.9
FALSE	197	168	158	Summer	M	12	54	6.8
FALSE	197	163	171	Summer	M	15	54	8.9
FALSE	197	136	186	Summer	F	11	54	5.3
FALSE	197	144	181	Summer	M	13	54	6.8
TRUE	197	30	131	Winter	M	13	31	6.2
FALSE	197	129	204	Summer	M	13	28	6
FALSE	197	144	181	Summer	M	13	54	6.9
FALSE	197	116	215	Summer	M	12	31	7.2
FALSE	197	90	125	Summer	M	11	31	4.1
FALSE	197	97	164	Summer	F	12	28	7.5
FALSE	197	163	171	Summer	M	15	54	8
FALSE	197	163	171	Summer	F	15	54	8.7
FALSE	197	136	186	Summer	M	11	54	5
FALSE	197	31	142	Winter	F	13	45	5.4
FALSE	197	168	158	Summer	F	12	45	6.3
FALSE	197	136	186	Summer	F	11	45	4.9
FALSE	197	33	138	Winter	F	13	45	9.2
FALSE	197	30	131	Winter	F	13	23	6.7
FALSE	197	36	240	Winter	M	13	41	7.3
FALSE	197	87	220	Winter	M	15	71	4.6
FALSE	197	70	229	Winter	F	15	56	7.9
FALSE	197	116	215	Summer	M	13	41	5.9
FALSE	213	36	240	Winter	F	14	41	7.6
FALSE	197	87	220	Winter	F	15	56	4.5
FALSE	197	87	220	Winter	F	15	56	5
FALSE	197	108	222	Summer	M	14	56	6.2
FALSE	197	113	157	Summer	M	12	41	7.3
FALSE	197	70	229	Winter	M	15	56	7.9
FALSE	197	102	225	Winter	M	13	41	6.3
FALSE	197	70	229	Winter	M	15	56	7.3
FALSE	197	46	233	Winter	F	12	41	6.7
FALSE	197	122	210	Summer	M	15	56	6.8
FALSE	197	144	181	Summer	F	12	56	5.3
FALSE	197	87	220	Winter	M	15	56	5.1
FALSE	197	46	233	Winter	M	12	41	7.5
FALSE	197	134	189	Summer	F	13	41	5.7
FALSE	197	122	210	Summer	F	14	41	7.6
FALSE	197	36	240	Winter	F	13	41	7.5
FALSE	197	36	240	Winter	F	14	41	7.7
FALSE	197	30	243	Winter	M	12	41	5.4
FALSE	197	70	229	Winter	M	12	41	6.6
FALSE	197	144	181	Summer	F	12	56	5.2
FALSE	197	163	171	Summer	F	13	41	5.6
TRUE	197	70	229	Winter	M	15	56	8
FALSE	197	36	240	Winter	M	13	41	7.2
FALSE	197	112	218	Summer	M	12	56	6.4
FALSE	197	121	212	Summer	M	13	56	6.2
FALSE	197	102	225	Winter	M	11	56	6.9
TRUE	197	36	240	Winter	F	13	19	6.3
FALSE	197	129	204	Summer	M	13	41	6.2
FALSE	197	31	242	Winter	F	13	41	8
FALSE	197	163	171	Summer	M	15	56	7.6
FALSE	197	46	233	Winter	F	12	41	7.3
FALSE	197	116	215	Summer	F	13	41	7.3
FALSE	197	87	220	Winter	M	15	54	4.6
FALSE	197	163	171	Summer	F	15	56	8.4
FALSE	197	31	242	Winter	F	13	41	7.3
FALSE	197	36	240	Winter	F	14	41	6.2
FALSE	197	108	221	Summer	F	11	42	6.1
FALSE	197	87	220	Winter	M	15	42	6
FALSE	197	80	222	Winter	M	13	42	7.5
FALSE	197	87	220	Winter	M	15	42	6.3
FALSE	197	87	220	Winter	M	14	42	7
FALSE	197	106	170	Summer	F	13	28	7.8
FALSE	197	51	230	Winter	M	14	28	7.6
FALSE	197	80	222	Winter	M	13	42	7.1
FALSE	197	51	230	Winter	F	14	28	7.5
FALSE	197	129	204	Summer	F	13	42	6
FALSE	197	51	230	Winter	M	14	28	7.7
FALSE	197	87	220	Winter	M	14	42	6
FALSE	197	106	170	Summer	F	13	28	8.1
FALSE	197	80	222	Winter	M	13	42	7.1
TRUE	197	134	189	Summer	M	13	28	6.6
FALSE	197	136	186	Summer	M	12	42	4.7
FALSE	197	104	224	Winter	M	11	42	5.7
FALSE	197	80	222	Winter	M	13	42	7.4
FALSE	197	20	244	Winter	M	13	42	5.6
FALSE	197	100	226	Winter	M	13	42	7.9
FALSE	197	108	221	Summer	M	11	42	5.4
FALSE	197	144	181	Summer	M	14	42	5.1
FALSE	197	87	220	Winter	M	14	42	7.2
FALSE	197	129	204	Summer	M	13	28	5.8
FALSE	197	87	220	Winter	M	14	42	7.4
FALSE	197	100	226	Winter	M	13	42	7.9
TRUE	197	168	158	Summer	F	12	52	7
FALSE	197	100	226	Winter	M	13	42	8.4
FALSE	197	116	215	Summer	F	12	42	7.6
FALSE	197	87	220	Winter	M	14	42	7.4
FALSE	197	129	204	Summer	F	13	42	6.3
FALSE	197	116	215	Summer	F	12	42	7
FALSE	197	49	232	Winter	M	13	28	7.6
FALSE	197	108	221	Summer	F	11	42	6
FALSE	197	20	244	Winter	F	13	40	5.6
FALSE	197	20	244	Winter	M	13	40	5.8
FALSE	197	100	226	Winter	M	13	40	8
FALSE	197	51	230	Winter	F	14	31	7.6
FALSE	197	20	244	Winter	F	13	40	5.9
FALSE	197	129	204	Summer	F	13	43	5.8
FALSE	197	70	229	Winter	M	12	43	6.4
FALSE	197	16	230	Winter	M	12	54	5.1
FALSE	197	80	222	Winter	F	13	40	7.3
FALSE	197	124	191	Summer	F	11	31	6.4
FALSE	197	60	232	Winter	F	13	31	7.2
FALSE	197	163	171	Summer	M	15	49	8.5
FALSE	197	124	191	Summer	M	11	31	6.4
FALSE	197	13	229	Winter	M	12	54	5.8
FALSE	197	102	225	Winter	F	13	43	5.8
FALSE	197	124	191	Summer	M	11	31	6.4
FALSE	197	16	230	Winter	M	12	54	4.8
FALSE	197	16	230	Winter	F	12	54	4.9
FALSE	197	163	171	Summer	M	13	43	6.1
FALSE	197	121	212	Summer	F	14	31	6.1
FALSE	197	110	154	Summer	M	13	43	7.1
FALSE	197	70	229	Winter	M	15	54	7.9
FALSE	197	116	215	Summer	M	13	43	7
FALSE	197	175	151	Summer	F	12	43	6.4
FALSE	197	64	232	Winter	F	13	30	8.8
TRUE	197	100	226	Winter	M	13	40	8
FALSE	197	46	233	Winter	M	12	31	5.2
FALSE	197	16	230	Winter	M	12	54	4.7
FALSE	197	36	240	Winter	F	13	51	7.2
FALSE	197	112	218	Summer	F	12	51	6.8
TRUE	197	49	232	Winter	F	13	64	3.8
TRUE	197	112	218	Summer	M	12	51	6.7
FALSE	197	36	240	Winter	F	14	51	7.1
FALSE	197	64	232	Winter	M	13	36	9
FALSE	197	13	229	Winter	F	12	52	6.1
TRUE	197	144	120	Summer	M	14	51	8.2
TRUE	197	70	229	Winter	F	12	51	6.2
FALSE	197	174	132	Summer	F	13	51	5.8
TRUE	197	173	154	Summer	M	13	51	7.2
FALSE	197	179	197	Summer	F	14	65	7.2
FALSE	197	177	208	Summer	M	14	45	8.4
FALSE	197	13	229	Winter	F	12	65	5.7
TRUE	197	170	208	Summer	M	13	26	7.9
FALSE	197	159	199	Summer	F	15	65	4
FALSE	197	204	180	Summer	M	13	65	4.3
FALSE	197	110	154	Summer	F	13	45	7.6
FALSE	197	179	197	Summer	F	15	57	6.5
FALSE	197	179	197	Summer	F	15	57	6
FALSE	197	150	208	Summer	M	13	57	8.5
FALSE	197	177	208	Summer	F	11	65	6.9
FALSE	197	16	230	Winter	F	12	51	4.5
FALSE	197	144	215	Summer	M	13	57	7.2
TRUE	197	179	197	Summer	F	13	26	5
TRUE	197	179	197	Summer	F	13	26	5.3
FALSE	197	161	222	Summer	M	12	57	6.3
FALSE	197	144	215	Summer	F	13	57	5.4
FALSE	197	185	186	Summer	F	13	65	6.5
FALSE	197	194	201	Summer	F	13	57	7.4
FALSE	197	144	215	Summer	M	13	57	6
FALSE	197	158	231	Summer	M	13	57	7.2
FALSE	197	159	199	Summer	M	13	65	5.6
FALSE	197	164	197	Summer	M	13	57	7.3
FALSE	197	177	208	Summer	M	11	65	7.2
FALSE	197	153	219	Summer	F	12	57	5.8
FALSE	197	161	218	Summer	F	13	57	6.7
FALSE	197	204	180	Summer	F	15	65	6.8
FALSE	197	124	209	Summer	M	12	57	5.5
FALSE	197	204	180	Summer	F	15	65	7.7
FALSE	197	161	222	Summer	M	12	57	7.4
FALSE	197	158	231	Summer	M	13	57	6.6
FALSE	197	144	215	Summer	M	13	57	8
FALSE	197	195	198	Summer	M	13	33	7.5
FALSE	197	144	215	Summer	M	13	57	6.3
FALSE	197	161	218	Summer	M	13	45	8.1
FALSE	197	177	208	Summer	M	14	45	8.5
FALSE	197	158	231	Summer	M	13	26	6.1
FALSE	197	153	220	Summer	F	13	57	7
FALSE	197	177	208	Summer	M	14	45	8.3
FALSE	197	166	197	Summer	M	15	57	8
FALSE	197	153	220	Summer	F	13	57	6.9
FALSE	197	179	197	Summer	F	14	65	7.5
TRUE	197	179	197	Summer	M	13	26	5.1
FALSE	197	175	151	Summer	F	12	45	6.2
FALSE	197	185	186	Summer	M	13	65	4.2
FALSE	197	144	215	Summer	F	13	57	7.3
FALSE	197	177	208	Summer	M	14	65	5.9
FALSE	197	204	180	Summer	M	15	65	7.8
FALSE	197	177	208	Summer	M	14	45	8.1
FALSE	197	158	231	Summer	M	13	27	6
FALSE	197	177	208	Summer	F	11	65	7.1
FALSE	197	185	186	Summer	F	13	65	7.1
FALSE	197	169	198	Summer	F	13	45	7
FALSE	197	204	180	Summer	M	15	65	4.4
FALSE	197	204	180	Summer	F	15	71	3.7
FALSE	197	149	239	Summer	M	13	40	7.6
FALSE	197	179	197	Summer	M	13	65	7.2
FALSE	197	132	245	Summer	M	15	65	8
FALSE	197	144	215	Summer	F	13	65	6.8
FALSE	197	204	180	Summer	M	15	71	3.7
FALSE	197	166	230	Summer	F	12	65	5.8
FALSE	197	161	218	Summer	M	13	47	8.3
FALSE	197	161	218	Summer	F	13	65	6.8
FALSE	197	194	201	Summer	F	13	65	9.9
FALSE	197	131	244	Summer	M	12	65	7.2
TRUE	197	118	246	Summer	F	13	27	7.4
FALSE	197	158	231	Summer	F	13	27	6.1
FALSE	197	158	231	Summer	M	13	65	5.8
FALSE	197	159	230	Summer	M	14	65	6.6
FALSE	197	158	231	Summer	F	13	27	6.5
FALSE	197	185	186	Summer	M	13	28	6.7
FALSE	197	149	239	Summer	M	13	71	5.9
FALSE	197	161	218	Summer	F	13	40	7.6
TRUE	197	131	233	Summer	M	15	27	8.8
FALSE	197	145	232	Summer	F	13	65	9.3
FALSE	197	149	239	Summer	M	13	71	6.1
FALSE	197	185	186	Summer	M	13	71	4.7
FALSE	197	157	230	Summer	F	12	35	5.5
FALSE	197	185	186	Summer	F	13	71	6
FALSE	197	102	225	Winter	F	13	40	6.3
FALSE	197	154	234	Summer	M	14	71	6.1
FALSE	197	157	230	Summer	M	12	27	4.7
FALSE	197	127	246	Summer	M	14	71	7.8
TRUE	197	138	258	Summer	F	14	55	7.7
FALSE	197	143	255	Summer	F	12	54	5.2
FALSE	197	149	239	Summer	F	13	51	6.4
FALSE	197	158	231	Summer	M	13	51	6.8
FALSE	197	166	230	Summer	M	12	55	5.9
TRUE	197	121	262	Summer	F	12	55	6.4
FALSE	197	158	247	Summer	F	12	51	7.7
FALSE	197	94	268	Summer	M	12	55	8.6
FALSE	197	73	279	Summer	M	13	35	9.3
FALSE	197	143	255	Summer	M	12	60	5.5
FALSE	197	158	231	Summer	F	13	51	6.6
FALSE	197	121	262	Summer	M	12	55	6.2
TRUE	197	131	244	Summer	F	12	55	6.5
FALSE	197	130	234	Summer	F	11	55	6.9
TRUE	197	179	197	Summer	M	13	54	5.3
FALSE	197	53	269	Summer	F	13	60	7.6
FALSE	197	131	244	Summer	F	12	55	7.1
FALSE	197	94	268	Summer	M	12	55	8.7
FALSE	197	107	267	Summer	M	12	55	8
FALSE	197	94	268	Summer	M	12	55	7.3
TRUE	197	194	201	Summer	F	13	29	10.5
FALSE	197	150	208	Summer	F	13	55	4.8
FALSE	197	31	242	Winter	F	13	51	7.5
FALSE	197	148	248	Summer	F	11	55	6.2
FALSE	197	150	249	Summer	M	12	51	8.5
FALSE	197	49	271	Summer	F	14	60	9.1
TRUE	197	179	197	Summer	F	13	54	5.5
FALSE	197	194	201	Summer	F	13	51	6.6
FALSE	197	145	232	Summer	F	13	55	7.2
FALSE	197	166	197	Summer	M	15	51	8.4
FALSE	197	143	255	Summer	M	12	30	6.5
FALSE	197	152	233	Summer	M	15	60	7
FALSE	197	107	267	Summer	M	12	54	9.1
FALSE	197	87	273	Summer	M	13	54	6.7
FALSE	197	73	279	Summer	F	13	54	8.9
FALSE	197	143	255	Summer	M	12	54	6.5
FALSE	197	169	198	Summer	M	13	51	7.1
FALSE	197	53	269	Summer	F	13	60	7.5
TRUE	197	163	233	Summer	M	13	51	7.7
FALSE	197	144	248	Summer	F	13	51	8.2
FALSE	197	53	269	Summer	F	13	60	6.9
TRUE	197	131	244	Summer	F	12	55	7.1
TRUE	197	138	258	Summer	F	14	55	8
FALSE	197	143	255	Summer	M	12	24	5.3
FALSE	197	73	279	Summer	M	13	54	9.4
FALSE	197	131	244	Summer	F	12	55	6.7
TRUE	197	148	248	Summer	F	11	55	6.2
FALSE	197	107	267	Summer	F	12	54	9
FALSE	197	87	273	Summer	F	13	54	6.6
FALSE	197	100	265	Summer	M	13	51	7.4
FALSE	197	87	273	Summer	M	13	54	6.7
TRUE	197	121	262	Summer	M	12	55	6.2
FALSE	197	152	232	Summer	F	13	51	6.5
FALSE	197	87	273	Summer	F	13	54	6
FALSE	197	131	244	Summer	M	14	40	6.6
FALSE	197	159	230	Summer	F	14	40	6.8
TRUE	197	143	255	Summer	F	12	40	5
FALSE	197	73	279	Summer	M	13	42	4.9
FALSE	197	58	281	Summer	F	12	42	6.6
FALSE	197	163	233	Summer	F	13	40	6.7
FALSE	197	53	269	Summer	M	13	40	7.7
FALSE	197	67	212	Winter	M	13	40	6.5
TRUE	197	110	154	Summer	F	13	52	7.3
TRUE	197	204	180	Summer	M	15	42	3.1
FALSE	197	107	267	Summer	F	12	42	7.6
FALSE	197	138	258	Summer	F	14	42	7.7
FALSE	197	67	212	Winter	M	13	40	7.3
FALSE	197	42	249	Summer	M	13	40	7.6
FALSE	197	58	281	Summer	F	12	42	7
FALSE	197	154	247	Summer	F	13	40	7.9
FALSE	197	94	268	Summer	F	12	40	7.9
FALSE	197	42	249	Summer	F	13	40	7.8
TRUE	197	145	232	Summer	M	13	42	6.8
FALSE	197	44	272	Summer	F	13	42	6.1
FALSE	197	107	267	Summer	M	12	40	5.2
FALSE	197	87	273	Summer	M	13	40	6.3
FALSE	197	42	249	Summer	M	13	40	8.2
FALSE	197	42	249	Summer	M	13	40	7.3
FALSE	197	73	279	Summer	F	13	42	5.3
FALSE	197	42	207	Winter	M	12	51	5.5
TRUE	197	175	151	Summer	M	12	54	6.7
FALSE	197	73	279	Summer	F	13	43	8.7
FALSE	197	26	213	Winter	M	14	51	8.4
FALSE	197	53	201	Winter	M	13	54	5.5
FALSE	197	24	215	Winter	M	13	51	8.4
FALSE	197	34	205	Winter	M	12	52	4.2
FALSE	213	42	207	Winter	M	12	51	5.7
FALSE	197	26	213	Winter	M	14	51	8.2
FALSE	197	42	249	Summer	F	13	54	7
FALSE	197	49	271	Summer	F	14	51	4.9
FALSE	197	42	207	Winter	M	12	51	6.1
FALSE	197	42	207	Winter	F	12	51	5.3
FALSE	197	70	206	Winter	F	14	54	5.7
FALSE	197	26	213	Winter	M	14	51	8.7
FALSE	197	53	201	Winter	M	13	54	5.6
FALSE	197	26	213	Winter	F	14	51	8.4
FALSE	197	34	205	Winter	M	12	54	4.2
FALSE	197	70	206	Winter	F	14	54	5.8
FALSE	197	173	154	Summer	F	13	54	7
FALSE	197	70	206	Winter	F	14	54	6.4
FALSE	197	53	201	Winter	M	13	54	6.1
FALSE	197	77	200	Winter	F	15	54	6.1
FALSE	197	34	205	Winter	M	12	54	4.8
FALSE	197	42	207	Winter	F	12	51	5.1
FALSE	197	34	205	Winter	M	12	54	4
FALSE	197	26	213	Winter	F	14	51	6.7
TRUE	197	124	191	Summer	F	11	33	6.6
FALSE	197	53	201	Winter	F	13	54	6
FALSE	197	34	205	Winter	F	12	54	4.5
FALSE	197	70	206	Winter	M	14	54	6.6
FALSE	197	42	249	Summer	M	13	54	8.1
FALSE	197	42	249	Summer	F	13	54	7.7
FALSE	197	34	205	Winter	M	12	54	4.5
FALSE	197	67	212	Winter	M	13	49	7.9
FALSE	197	24	215	Winter	M	13	51	8
FALSE	197	26	213	Winter	F	14	51	8.7
FALSE	197	34	205	Winter	M	12	54	4.3
FALSE	197	42	207	Winter	M	12	51	5.5
FALSE	213	42	207	Winter	M	12	51	5.9
FALSE	197	42	207	Winter	M	12	51	5.2
FALSE	197	53	201	Winter	F	13	52	5.7
FALSE	197	100	265	Summer	M	13	55	7.2
FALSE	197	53	269	Summer	M	13	72	7.2
TRUE	197	26	213	Winter	F	14	37	8.4
FALSE	197	42	249	Summer	F	13	52	7.4
FALSE	197	143	235	Summer	F	15	52	3.4
FALSE	197	70	206	Winter	F	14	52	5.4
FALSE	197	53	201	Winter	F	13	52	5.9
FALSE	197	143	235	Summer	F	15	52	3.3
FALSE	197	26	213	Winter	M	14	35	8.4
FALSE	197	14	194	Winter	F	12	34	6.1
FALSE	197	70	206	Winter	F	14	35	5.8
TRUE	197	64	232	Winter	F	13	30	8.6
FALSE	197	53	201	Winter	F	13	35	5.4
FALSE	197	70	206	Winter	M	14	47	5.4
FALSE	197	65	207	Winter	F	12	81	6.4
FALSE	197	147	199	Summer	F	13	56	5.5
FALSE	197	65	207	Winter	F	12	48	6.4
